# Supplementary material for: Photochemical and thermal synthesis and characterization of polypyridine ruthenium(ii) complexes containing different monodentate ligandsElectronic supplementary information (ESI) available: View of the dimeric units of 8 and proton indexation used in the 1H NMR data. See http://www.rsc.org/suppdata/dt/b3/b310198c/
Source: Royal Society of Chemistry journal article supplement (doi:10.1039/b310198c), 2003-01-01
Supplement: b310198c.pdf [file b310198c.pdf]

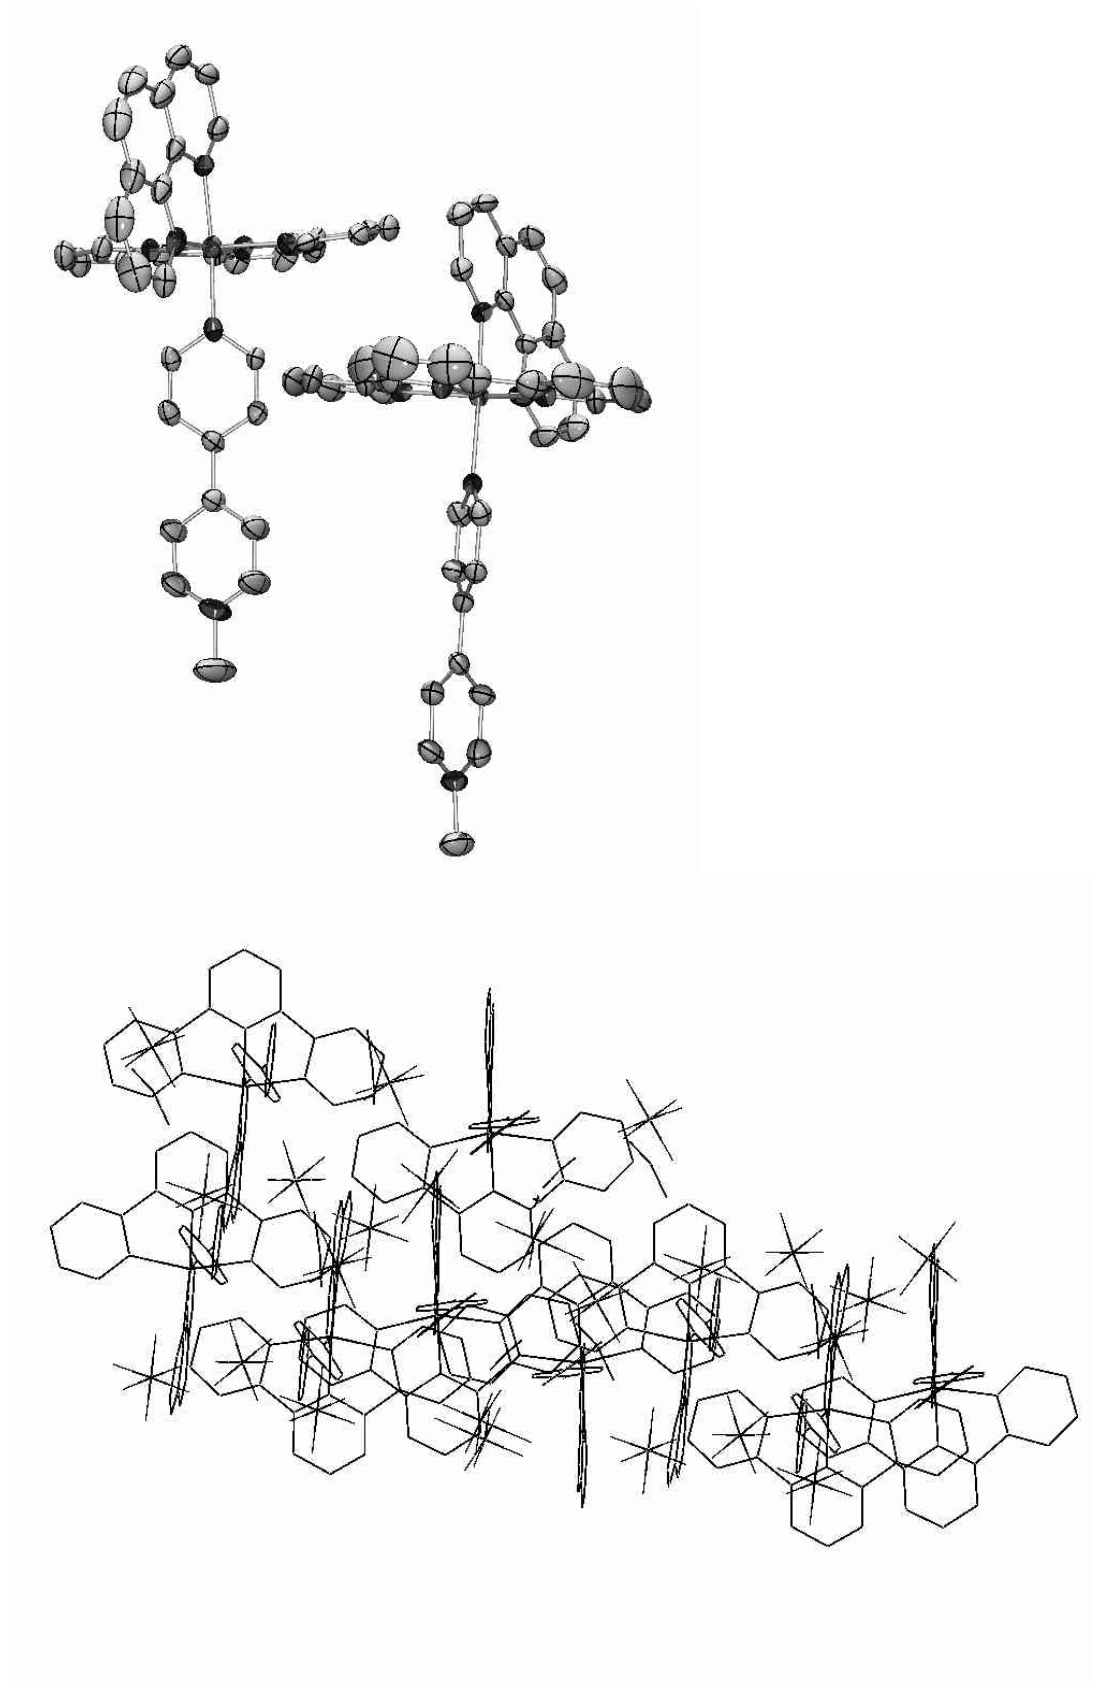

Dimeric units and the three dimensional structure of **8**.

**Photochemical and thermal synthesis and characterization of polypyridine ruthenium(II) complexes containing different monodentate ligands.**

Sylvestre Bonnet, Jean-Paul Collin, Nathalie Gruber, Jean-Pierre Sauvage and Emma R. Schofield.

**Photochemical and thermal synthesis and characterization of polypyridine ruthenium(II) complexes containing different monodentate ligands.**

Sylvestre Bonnet, Jean-Paul Collin, Nathalie Gruber, Jean-Pierre Sauvage and Emma R. Schofield.

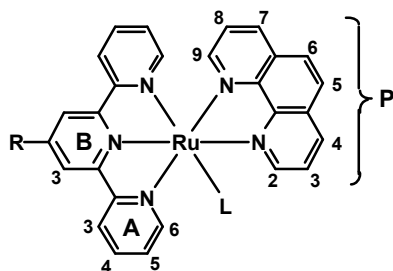

**R = H**

**1 : L = Cl<sup>-</sup>**

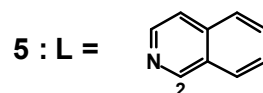

**2 : L = CH<sub>3</sub>CN**

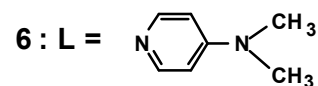

**3 : L = NC<sup>-</sup>**

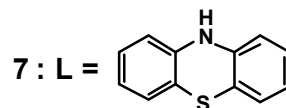

**4 : L =**

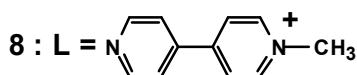

**R =**

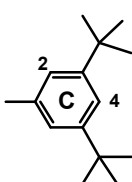

**9 : L = H<sub>2</sub>O**

**11: L = Cl<sup>-</sup>**

**10 : L =**

**12: L = CH<sub>3</sub>CN**

**proton indexation used in <sup>1</sup>H NMR data**
